# Supplementary material for: A New Asynchronous Parallel Algorithm for Inferring Large-Scale Gene Regulatory Networks
Source: PubMed Central journal article supplement (PMC4373852; doi:10.1371/journal.pone.0119294), 2015-03-25
Supplement: pone.0119294.s012.pdf [file pone.0119294.s012.pdf]

**S1 Table. The selection of the MI threshold value  $\lambda$  on the structure of networks.**

| $\lambda$ | clusters | Average | Max | Min | modularity | modularity | nodes |
|-----------|----------|---------|-----|-----|------------|------------|-------|
| 0.4       | 3        | 500.333 | 782 | 41  | -0.201     | 0.166      | 1501  |
| 0.5       | 3        | 499.667 | 772 | 32  | -0.178     | 0.184      | 1499  |
| 0.6       | 3        | 499.667 | 772 | 32  | -0.178     | 0.184      | 1499  |
| 0.7       | 3        | 495.333 | 763 | 186 | -0.084     | 0.224      | 1486  |
| 0.8       | 3        | 490     | 608 | 266 | 0.028      | 0.273      | 1470  |
| 0.9       | 7        | 206.857 | 661 | 2   | 0.006      | 0.272      | 1448  |
| 1.0       | 12       | 118.5   | 562 | 2   | 0.103      | 0.305      | 1422  |
| 1.1       | 18       | 76.889  | 621 | 2   | 0.074      | 0.298      | 1384  |
| 1.2       | 18       | 73.889  | 405 | 2   | 0.155      | 0.362      | 1330  |
| 1.3       | 19       | 67.421  | 407 | 2   | 0.242      | 0.383      | 1281  |
| 1.4       | 26       | 47.115  | 367 | 2   | 0.219      | 0.397      | 1225  |
| 1.5       | 35       | 33.257  | 351 | 2   | 0.244      | 0.416      | 1164  |
| 1.6       | 38       | 28.605  | 282 | 2   | 0.292      | 0.442      | 1087  |
| 1.7       | 46       | 21.761  | 250 | 2   | 0.331      | 0.467      | 1001  |
| 1.8       | 54       | 16.963  | 241 | 2   | 0.365      | 0.484      | 916   |
| 1.9       | 61       | 13.328  | 215 | 2   | 0.43       | 0.533      | 813   |
| 2.0       | 64       | 11.156  | 140 | 2   | 0.481      | 0.576      | 714   |
