# Supplementary material for: A New Asynchronous Parallel Algorithm for Inferring Large-Scale Gene Regulatory Networks
Source: PubMed Central journal article supplement (PMC4373852; doi:10.1371/journal.pone.0119294), 2015-03-25
Supplement: pone.0119294.s013.pdf [file pone.0119294.s013.pdf]

**S2 Table. Details for the network with size 92**

| nodes | edges | isolated nodes |
|-------|-------|----------------|
| 92    | 194   | 9              |
