# Supplementary material for: A New Asynchronous Parallel Algorithm for Inferring Large-Scale Gene Regulatory Networks
Source: PubMed Central journal article supplement (PMC4373852; doi:10.1371/journal.pone.0119294), 2015-03-25
Supplement: pone.0119294.s014.pdf [file pone.0119294.s014.pdf]

**S3 Table. Details for the network with size 202**

| nodes | edges | isolated nodes |
|-------|-------|----------------|
| 202   | 547   | 58             |
