# Supplementary material for: A New Asynchronous Parallel Algorithm for Inferring Large-Scale Gene Regulatory Networks
Source: PubMed Central journal article supplement (PMC4373852; doi:10.1371/journal.pone.0119294), 2015-03-25
Supplement: pone.0119294.s015.pdf [file pone.0119294.s015.pdf]

**S4 Table. Details for the network with size 1505**

| nodes | edges | isolated nodes |
|-------|-------|----------------|
| 1505  | 3753  | 267            |
