# Supplementary material for: A New Asynchronous Parallel Algorithm for Inferring Large-Scale Gene Regulatory Networks
Source: PubMed Central journal article supplement (PMC4373852; doi:10.1371/journal.pone.0119294), 2015-03-25
Supplement: pone.0119294.s016.pdf [file pone.0119294.s016.pdf]

**S5 Table. Details for the network with size 4511**

| nodes | edges | isolated nodes |
|-------|-------|----------------|
| 4511  | 7869  | 2487           |
