# Supplementary material for: A New Asynchronous Parallel Algorithm for Inferring Large-Scale Gene Regulatory Networks
Source: PubMed Central journal article supplement (PMC4373852; doi:10.1371/journal.pone.0119294), 2015-03-25
Supplement: pone.0119294.s017.pdf [file pone.0119294.s017.pdf]

S6 Table. The effects of the threshold value  $\theta$  of parameters in networks on the four indexes in size 202

| $\theta$ | TPR    | FPR    | PPV    | ACC    |
|----------|--------|--------|--------|--------|
| 0.01     | 0.9796 | 0.0190 | 0.0583 | 0.9810 |
| 0.02     | 0.9592 | 0.0185 | 0.0588 | 0.9815 |
| 0.03     | 0.9592 | 0.0178 | 0.0607 | 0.9821 |
| 0.04     | 0.9592 | 0.0172 | 0.0627 | 0.9827 |
| 0.05     | 0.9592 | 0.0169 | 0.0640 | 0.9831 |
| 0.06     | 0.9592 | 0.0163 | 0.0661 | 0.9837 |
| 0.07     | 0.9592 | 0.0159 | 0.0667 | 0.9841 |
| 0.08     | 0.9592 | 0.0156 | 0.0689 | 0.9844 |
| 0.09     | 0.9592 | 0.0153 | 0.0699 | 0.9846 |
| 0.10     | 0.9592 | 0.0150 | 0.0714 | 0.9850 |
| 0.11     | 0.8980 | 0.0147 | 0.0685 | 0.9852 |
| 0.12     | 0.8367 | 0.0144 | 0.0654 | 0.9854 |
| 0.13     | 0.8163 | 0.0143 | 0.0644 | 0.9855 |
| 0.14     | 0.7347 | 0.0141 | 0.0590 | 0.9856 |
| 0.15     | 0.6122 | 0.0138 | 0.0507 | 0.9858 |
| 0.16     | 0.5510 | 0.0136 | 0.0463 | 0.9858 |
| 0.17     | 0.5306 | 0.0134 | 0.0453 | 0.9860 |
| 0.18     | 0.5306 | 0.0134 | 0.0454 | 0.9860 |
| 0.19     | 0.5306 | 0.0133 | 0.0457 | 0.9861 |
| 0.20     | 0.5306 | 0.0132 | 0.0460 | 0.9862 |
| 0.30     | 0.5306 | 0.0120 | 0.0505 | 0.9875 |
| 0.40     | 0.5306 | 0.0109 | 0.0552 | 0.9885 |
