# Supplementary material for: A New Asynchronous Parallel Algorithm for Inferring Large-Scale Gene Regulatory Networks
Source: PubMed Central journal article supplement (PMC4373852; doi:10.1371/journal.pone.0119294), 2015-03-25
Supplement: pone.0119294.s018.pdf [file pone.0119294.s018.pdf]

**S7 Table. The effects of the parameter threshold value  $\theta$  on the four indexes in size 1505**

| $\theta$ | TPR    | FPR    | PPV    | ACC    |
|----------|--------|--------|--------|--------|
| 0.01     | 0.5018 | 0.0040 | 0.0304 | 0.9959 |
| 0.02     | 0.4929 | 0.0037 | 0.0321 | 0.9962 |
| 0.03     | 0.4859 | 0.0035 | 0.0336 | 0.9964 |
| 0.04     | 0.4753 | 0.0033 | 0.0345 | 0.9965 |
| 0.05     | 0.4611 | 0.0032 | 0.0351 | 0.9967 |
| 0.06     | 0.4541 | 0.0030 | 0.0362 | 0.9968 |
| 0.07     | 0.4488 | 0.0029 | 0.0375 | 0.9970 |
| 0.08     | 0.4417 | 0.0028 | 0.0385 | 0.9971 |
| 0.09     | 0.4646 | 0.0027 | 0.0394 | 0.9972 |
| 0.10     | 0.4329 | 0.0026 | 0.0406 | 0.9973 |
| 0.11     | 0.4240 | 0.0025 | 0.0423 | 0.9974 |
| 0.12     | 0.4205 | 0.0024 | 0.0423 | 0.9975 |
| 0.13     | 0.4117 | 0.0023 | 0.0425 | 0.9975 |
| 0.14     | 0.4046 | 0.0022 | 0.0431 | 0.9976 |
| 0.15     | 0.4011 | 0.0022 | 0.0440 | 0.9977 |
| 0.16     | 0.4011 | 0.0021 | 0.0455 | 0.9977 |
