# Supplementary material for: A New Asynchronous Parallel Algorithm for Inferring Large-Scale Gene Regulatory Networks
Source: PubMed Central journal article supplement (PMC4373852; doi:10.1371/journal.pone.0119294), 2015-03-25
Supplement: pone.0119294.s019.pdf [file pone.0119294.s019.pdf]

**S8 Table. Comparison of different indexes on network with size 19**

| Method           | TPR           | FPR           | PPV           | ACC           |
|------------------|---------------|---------------|---------------|---------------|
| LSGPA            | <b>0.7222</b> | <b>0.0029</b> | 0.4928        | 0.9134        |
| NARROMI          | 0.7222        | 0.0262        | <b>0.5909</b> | <b>0.9612</b> |
| PCA-CMI(0-order) | 0.5000        | 0.4140        | 0.0596        | 0.5817        |
| PCA-CMI(1-order) | 0.5000        | 0.3469        | 0.0703        | 0.6454        |
| PCA-CMI(2-order) | 0.5000        | 0.3469        | 0.0703        | 0.6454        |

The best performer for the relative item is noted in bold.
