# Supplementary material for: A New Asynchronous Parallel Algorithm for Inferring Large-Scale Gene Regulatory Networks
Source: PubMed Central journal article supplement (PMC4373852; doi:10.1371/journal.pone.0119294), 2015-03-25
Supplement: pone.0119294.s022.pdf [file pone.0119294.s022.pdf]

### S3 Text. Method to deal with the limitation of computer nodes

This process provides a widespread way to use LSGPA on the other machine which may contain different computing nodes.  $Max\_N$  is the maximum number of computing nodes.

```
Master process:
Data input
→ Calculate MI value of between all gene pairs and get the MI matrix
→ Clustering genes through MI matrix,  $M$  clusters.
→ MPI_Broadcast  $M$  to all Slaves
→ If  $M \leq Max\_N$ 
do{
→ Extract every cluster data
{
MPI_Send data1 to Slave 1.
MPI_Send data2 to Slave 2.
...
MPI_Send dataN to Slave M.
}
→ MPI_Recv Net 1 to Slave 1.
MPI_Recv Net 2 to Slave 2.
...
MPI_Recv Net M to Slave M.
}
→ If  $M > Max\_N$ 
do{
→ Extract every cluster data
{
MPI_Send data1 to Slave 1%  $Max\_N$ 
MPI_Send data2 to Slave 2%  $Max\_N$ 
...
MPI_Send dataN to Slave N%  $Max\_N$ 
}
→ MPI_Recv Net 1 to Slave 1%  $Max\_N$ 
MPI_Recv Net 2 to Slave 2%  $Max\_N$ 
...
MPI_Recv Net N to Slave N%  $Max\_N$ 
}
Note: % said modular arithmetic, which is the largest Slave number was 169, when the block number is greater than  $Max\_N$ , such as cluster( $Max\_N+1$ ) assigned Slave 1, ( $Max\_N+1$ )% of  $Max\_N =$  Slave and cluster ( $Max\_N+2$ ) assigned Slave 2, ( $Max\_N+2$ )% of  $Max\_N =$  Slave so cycle.
→ Combine Net1~N and finally we obtain Net
→ Out put Net
Slave process No.1:
→ MPI_Recv N from Master process.
→ If  $N \leq Max\_N$ 
do
{
→ MPI_Recv data1 from Master process.
→ MPI_Recv data from other slave processes.(the data which other clusters act on Slave NO.1)
MPI_Send data to all Slaves(the data which Slave NO.1 act on other clusters)
→ Get Net 1 result from optimization method
→ MPI_Send Net 1 to Master Process
}
→ If  $N > Max\_N$ 
do{
```

```
→ MPI_Recv data1 from Master process.
→ MPI_Recv data from other slave processes.(the data which other clusters act on cluster NO.1)
  MPI_Send data to all Slaves (the data which Slave clusterNO.1 act on other clusters)
→ Get Net 1 result from optimization method
→ MPI_Send Net 1 to Master Process
→ MPI_Recv data(Max_N+1)from Master process.
→ MPI_Recv data from other slave processes.(the data which other clusters act on cluster
  NO.(Max_N+1))
  MPI_Send data to all Slaves(the data which Slave cluster(Max_N+1)act on other clusters)
→ Get Net (Max_N+1)result from optimization method
→ MPI_Send Net (Max_N+1) to Master Process
}

Slave 2~ Max_N repeat the same operation as Slave 1.
Slave process No.2:
Slave process No.3:
...
Slave process No. Max_N
```
